# Supplementary figures and images for: Oral Health–Related Quality of Life Among Publicly Insured Mental Health Service Outpatients With Serious Mental Illness
Source: Atypon-hosted journal article supplement (doi:10.1176/appi.ps.201900111), 2019-09-16

### Consort Diagram

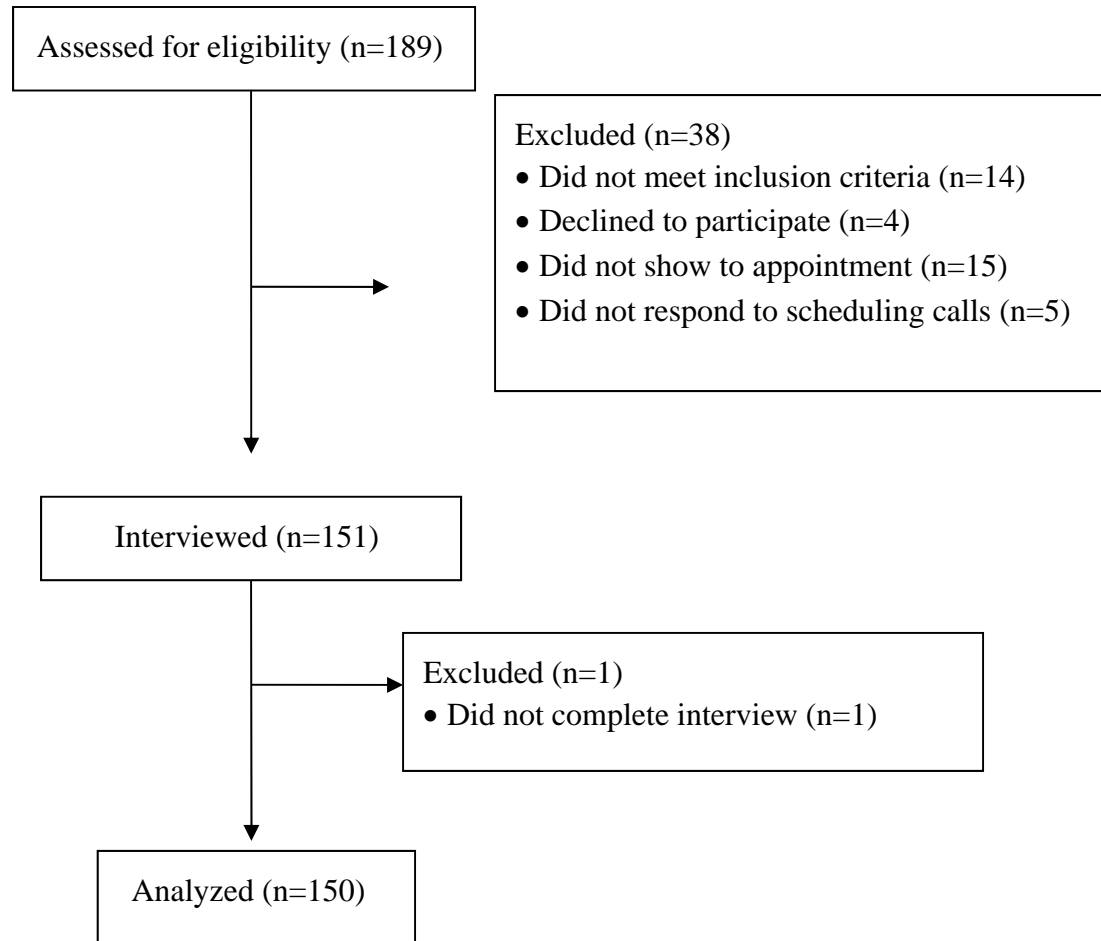

Supplement: appi.ps.201900111.ds001.pdf [file appi.ps.201900111.ds001.pdf]
